# Supplementary material for: Trifunctional electrocatalysts of ternary iron–copper–molybdenum Schiff base complexes applied to Zn–air battery and alkaline water splitting
Source: Royal Society of Chemistry journal article supplement (doi:10.1039/d3cy00228d), 2023-01-01
Supplement: d3cy00228d1.pdf [file d3cy00228d1.pdf]

## Supporting information

Trifunctional electrocatalysts of ternary iron copper molybdenum–Schiff bases complexes  
applied to Zn–air battery and alkaline water splitting

Tzu Hsuan Chiang\*, Yu-Si Chen

Department of Energy Engineering, National United University

No. 2, Lienda, Nan-Shi Li, Miaoli 36006, Taiwan (R.O.C.)

\*thchiang@nuu.edu.tw

\*Tel.: +886-37382385; Fax: +886-37382402

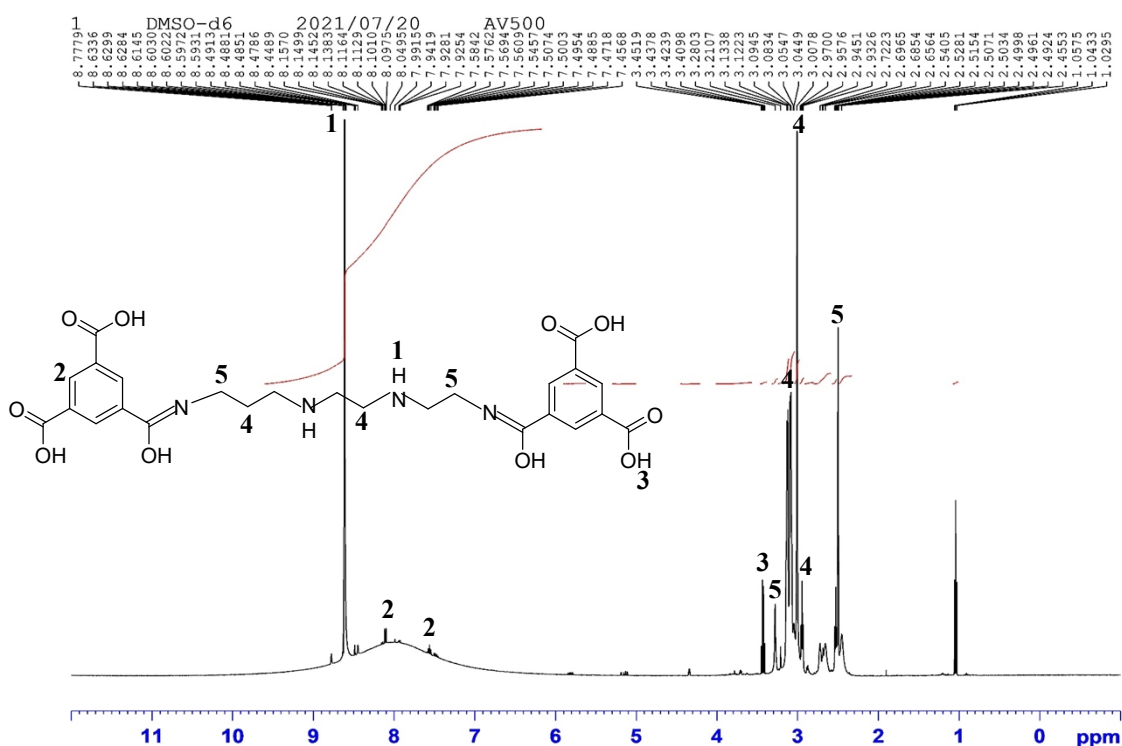

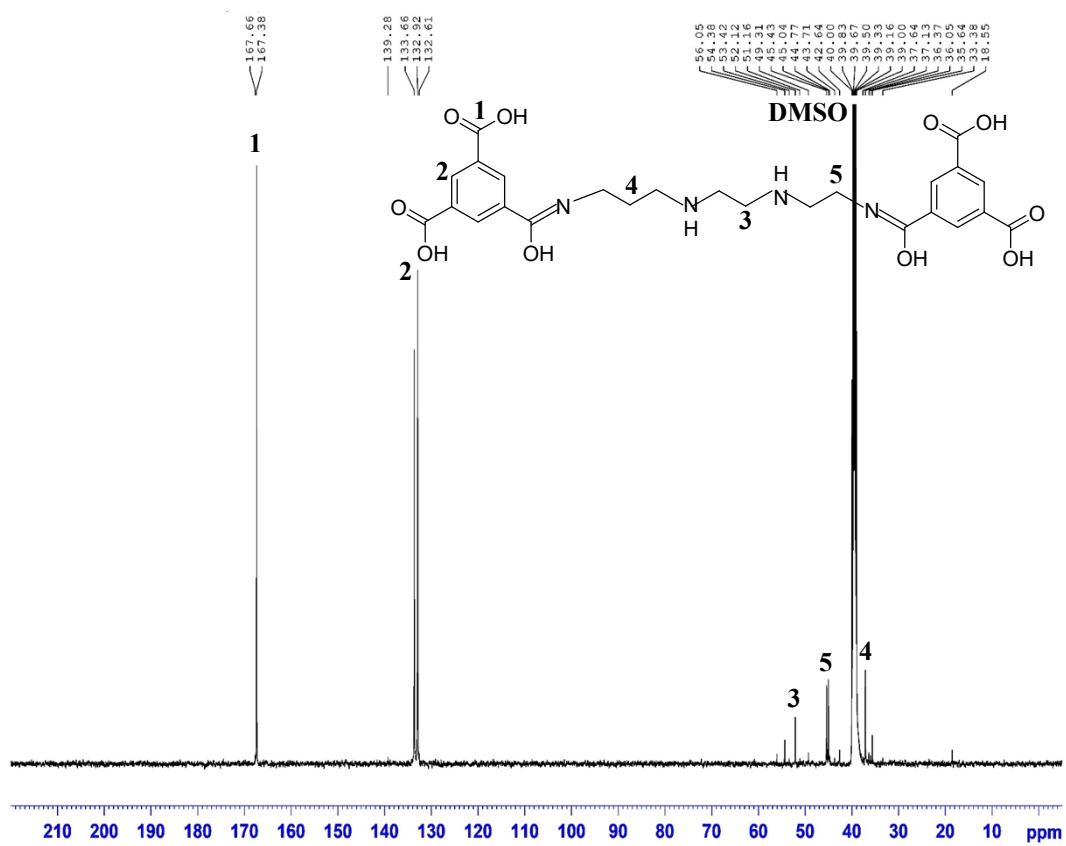

Figure S2.  $^{13}\text{C}$ -NMR of unheated SB.

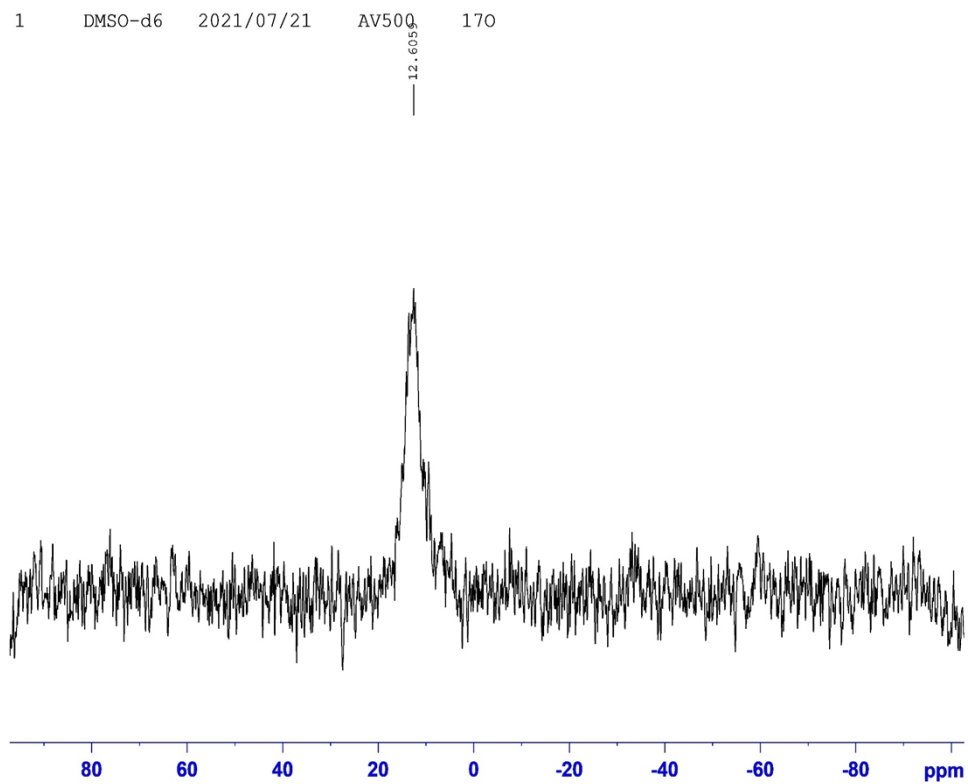

Figure S3.  $^{17}\text{O}$ -NMR of unheated SB.

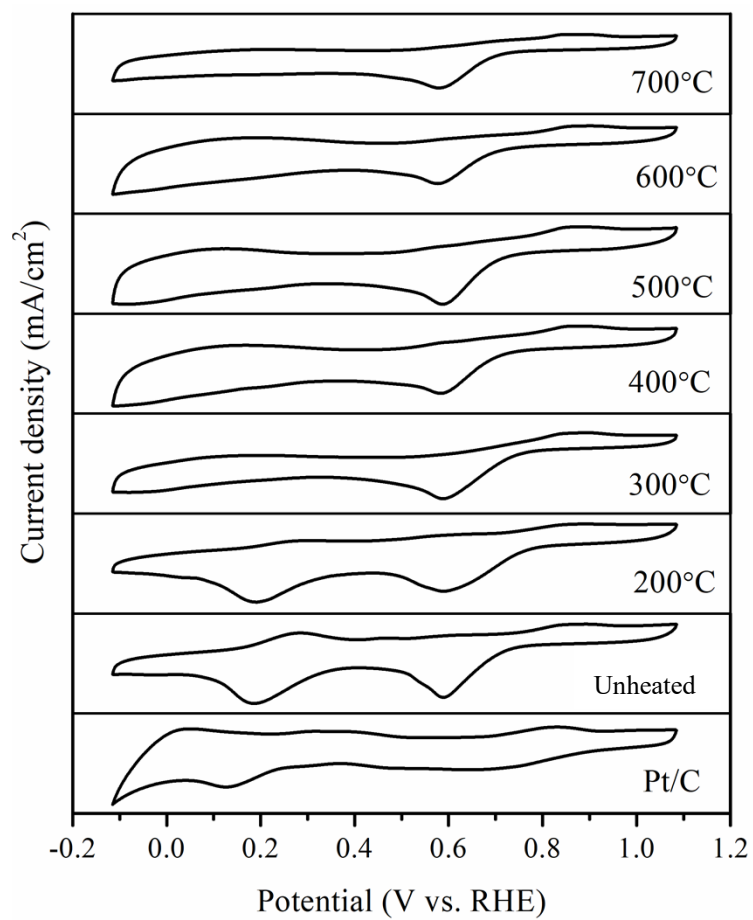

Figure S4. CV of Fe<sub>0.5</sub>Cu<sub>0.5</sub>Mo<sub>0.5</sub>-SB under different heating temperatures.

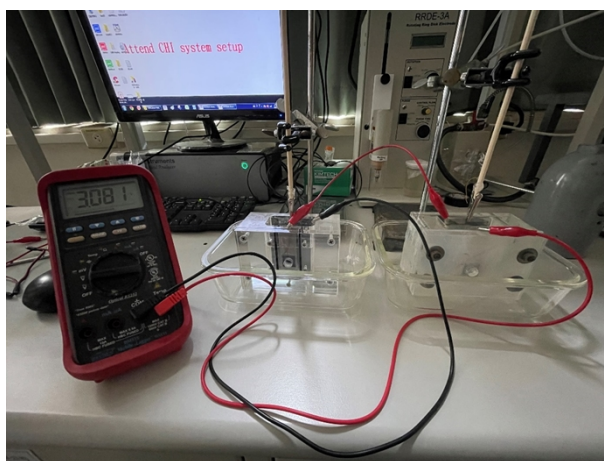

Figure S5. The assembled the two Zn-air batteries connected in series showing the voltage of 3.081 V by measured using a multimeter.

Table S1. Specific capacity and energy density of different electrocatalysts.

| Electrocatalysts                                                 | Current density      |                       | Specific capacity (mAh/g) |                       | Energy density (mWh/g) |                       |
|------------------------------------------------------------------|----------------------|-----------------------|---------------------------|-----------------------|------------------------|-----------------------|
|                                                                  | 5 mA/cm <sup>2</sup> | 10 mA/cm <sup>2</sup> | 5 mA/cm <sup>2</sup>      | 10 mA/cm <sup>2</sup> | 5 mA/cm <sup>2</sup>   | 10 mA/cm <sup>2</sup> |
| Fe <sub>0.5</sub> Cu <sub>0.5</sub> Mo <sub>0.45</sub> -SB-400/C | 292.51               | 682.96                | 362.24                    | 822.18                |                        |                       |
| Pt/C                                                             | 233.75               | 416.11                | 274.04                    | 478.27                |                        |                       |
| Pt/C + RuO <sub>2</sub>                                          | 222.18               | 420                   | 273.99                    | 506.54                |                        |                       |

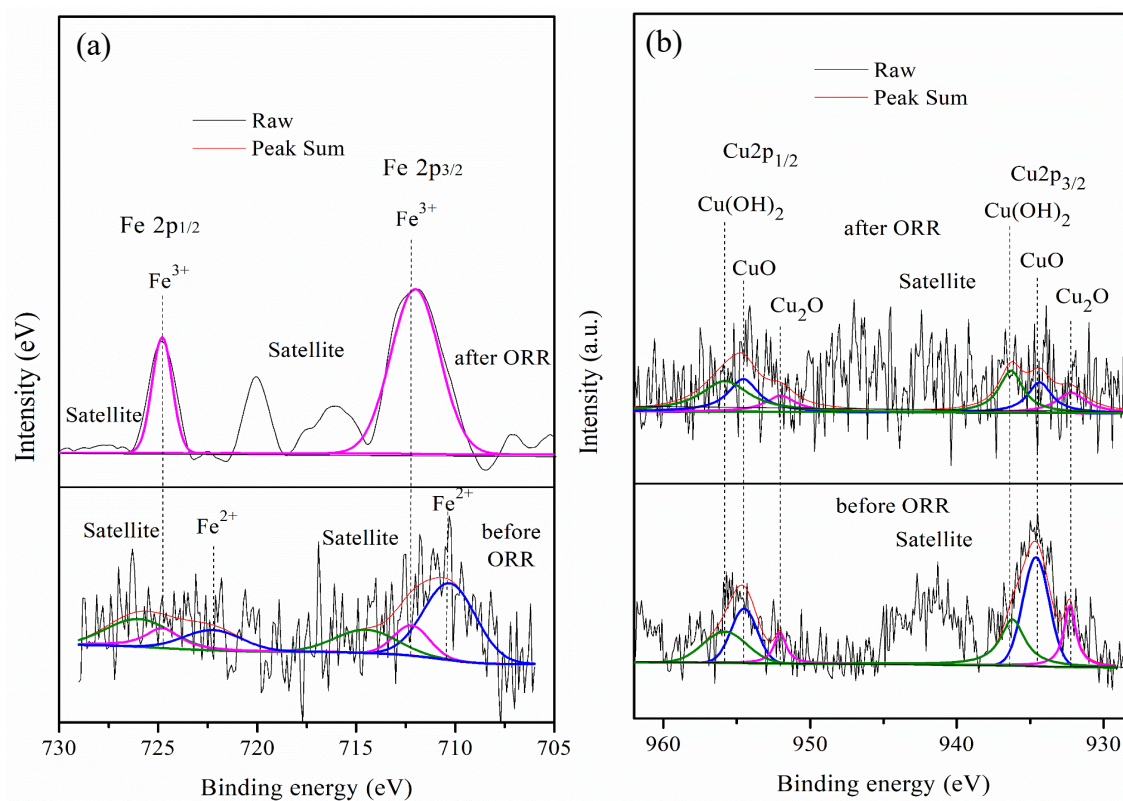

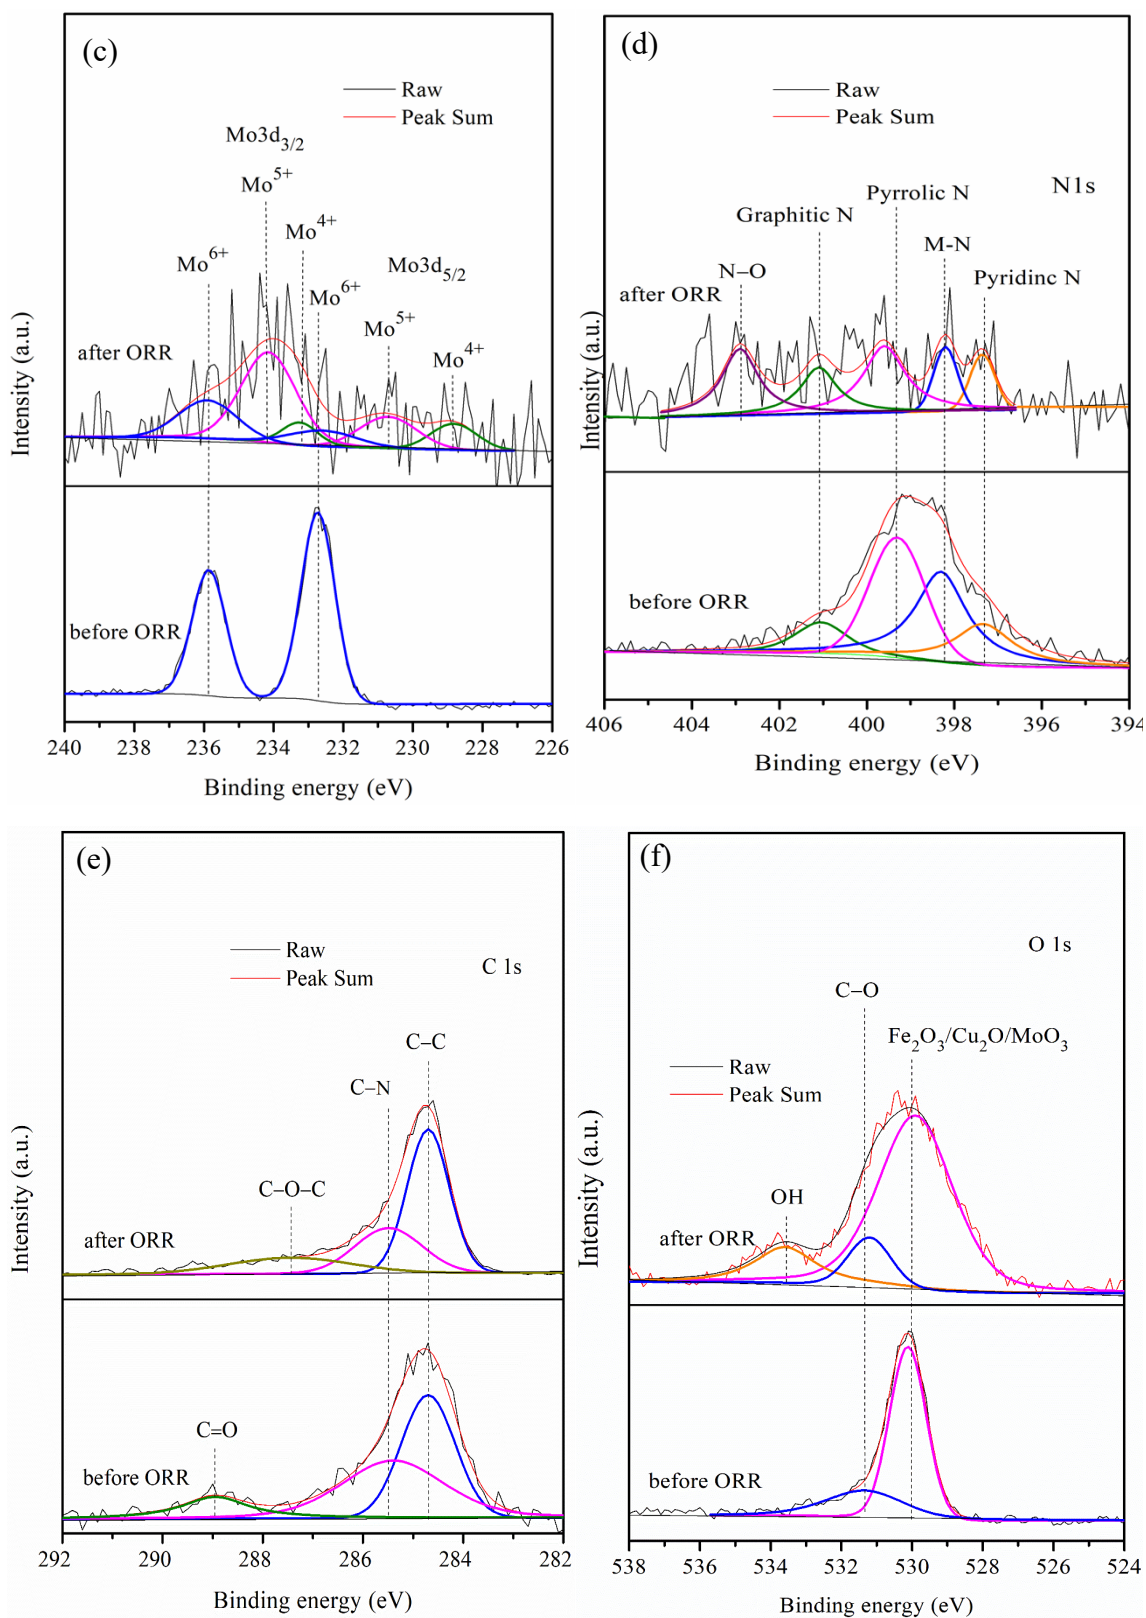

Figure S6. XPS spectra of (a) Fe 2p, (b) Cu2p, (c) Mo3d, (d) N1s (e) C1s, (f) O1s of the  $\text{Fe}_{0.5}\text{Cu}_{0.5}\text{Mo}_{0.5}\text{-SB-400}$  of before and after ORR.

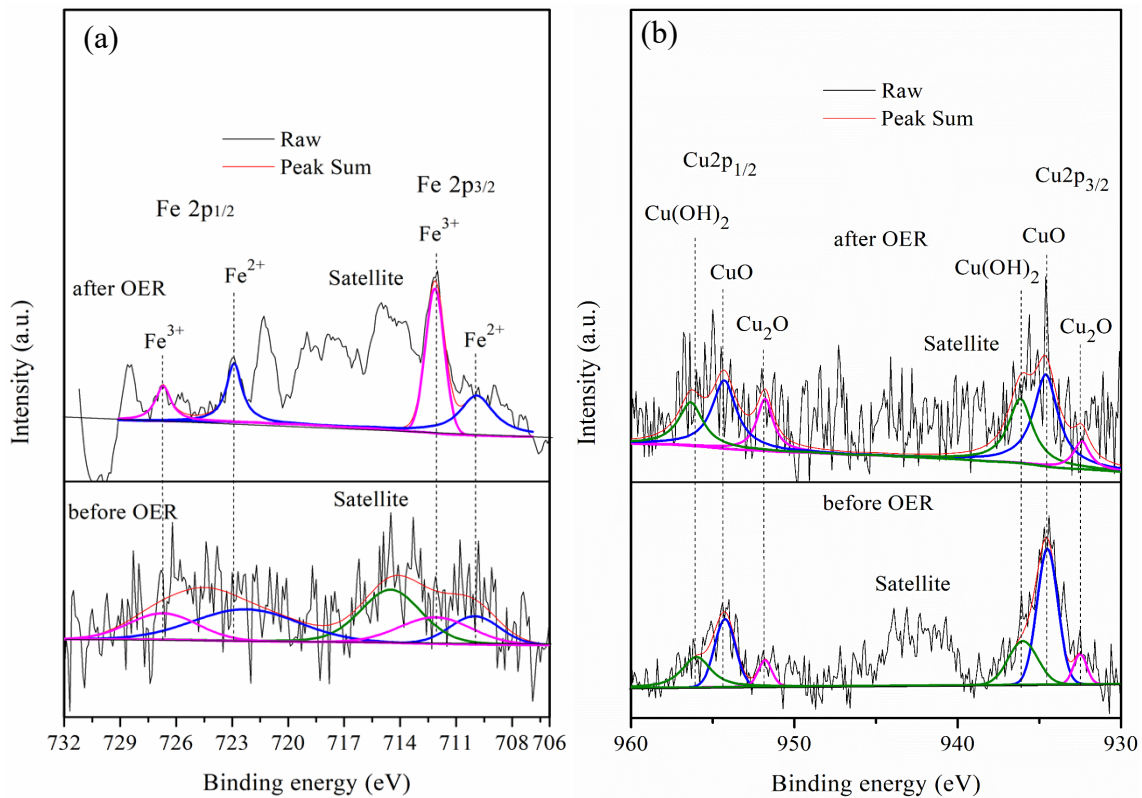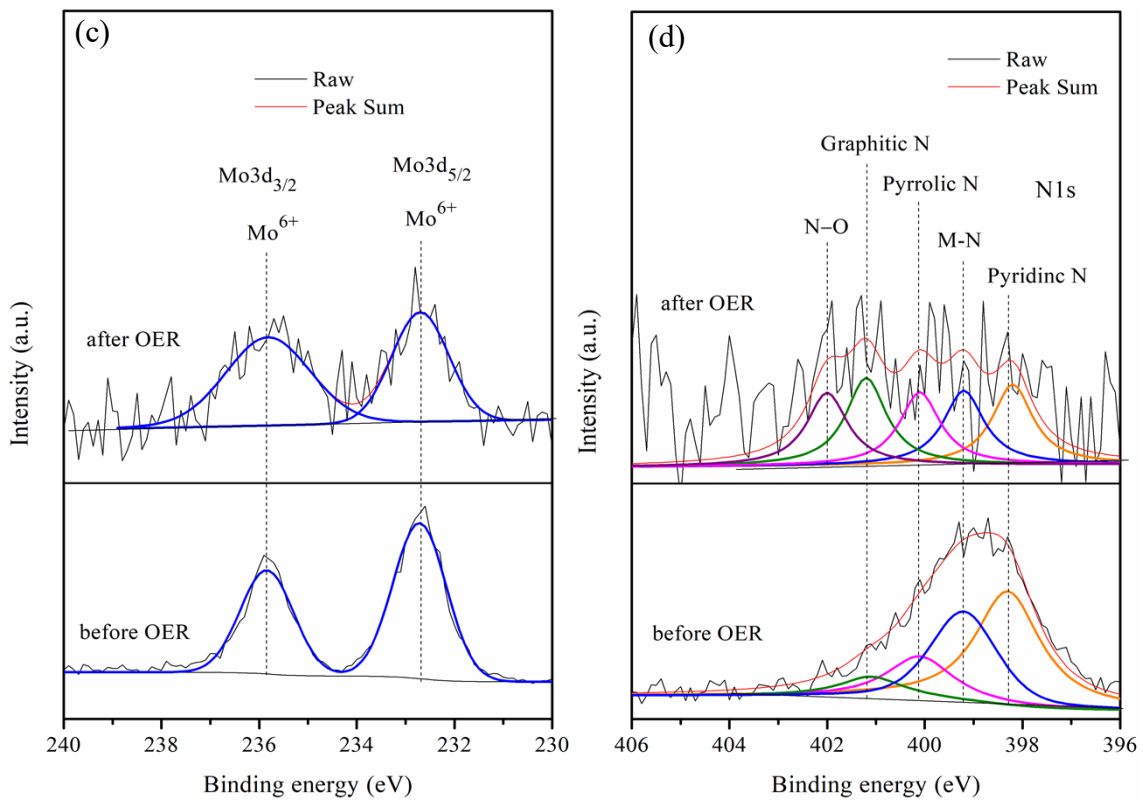

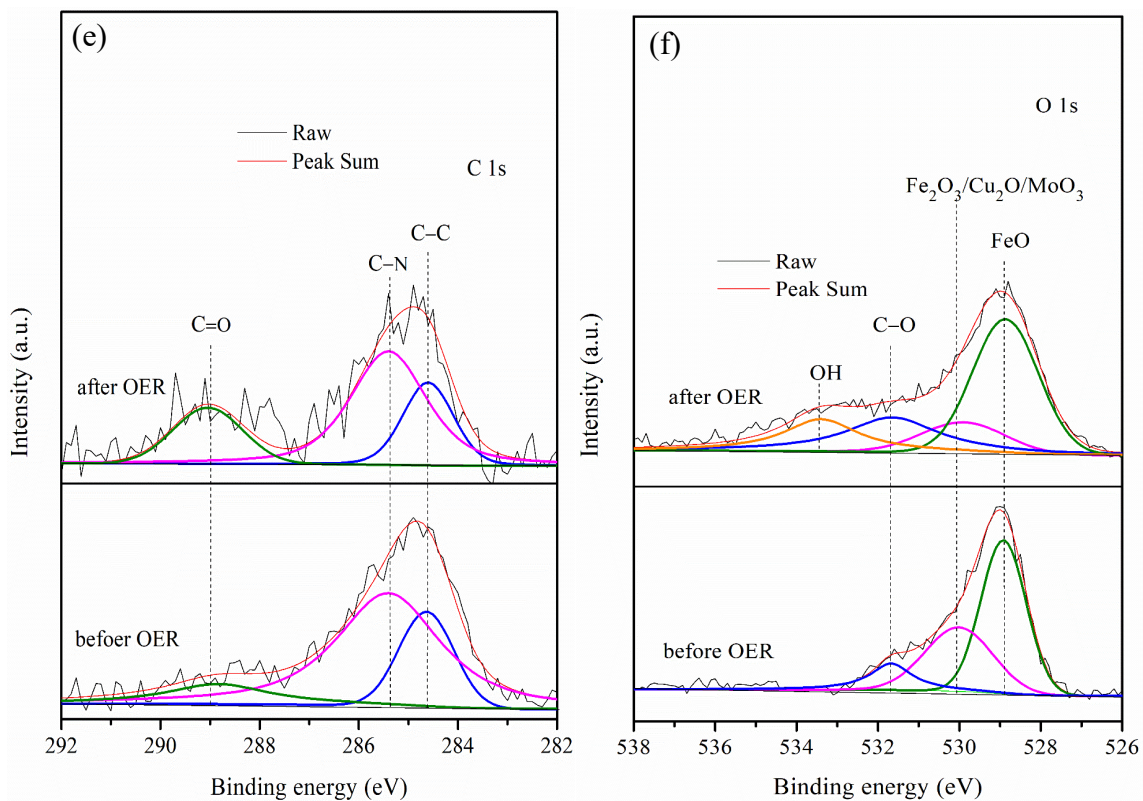

Figure S7. XPS spectra of (a) Fe 2p, (b) Cu2p, (c) Mo3d, (d) N1s, (e) C1s, (f) O1s of the  $\text{Fe}_{0.5}\text{Cu}_{0.5}\text{Mo}_{0.5}\text{-SB-600}$  of before and after OER.

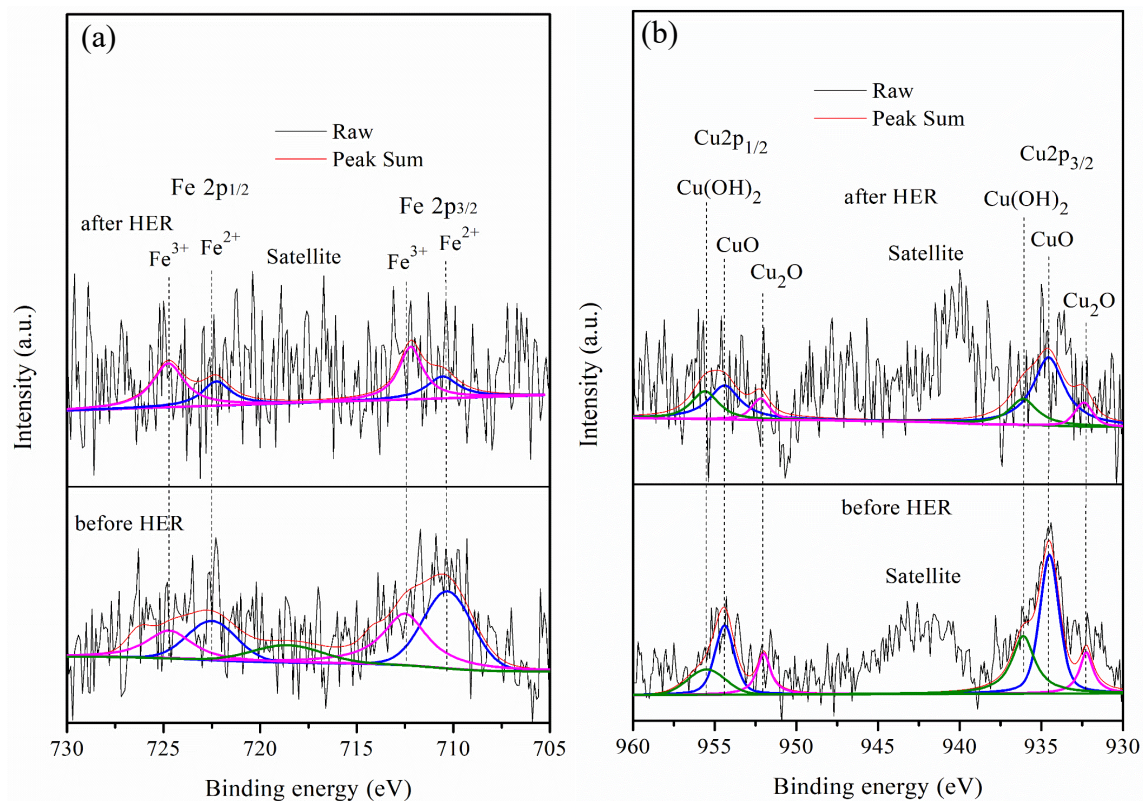

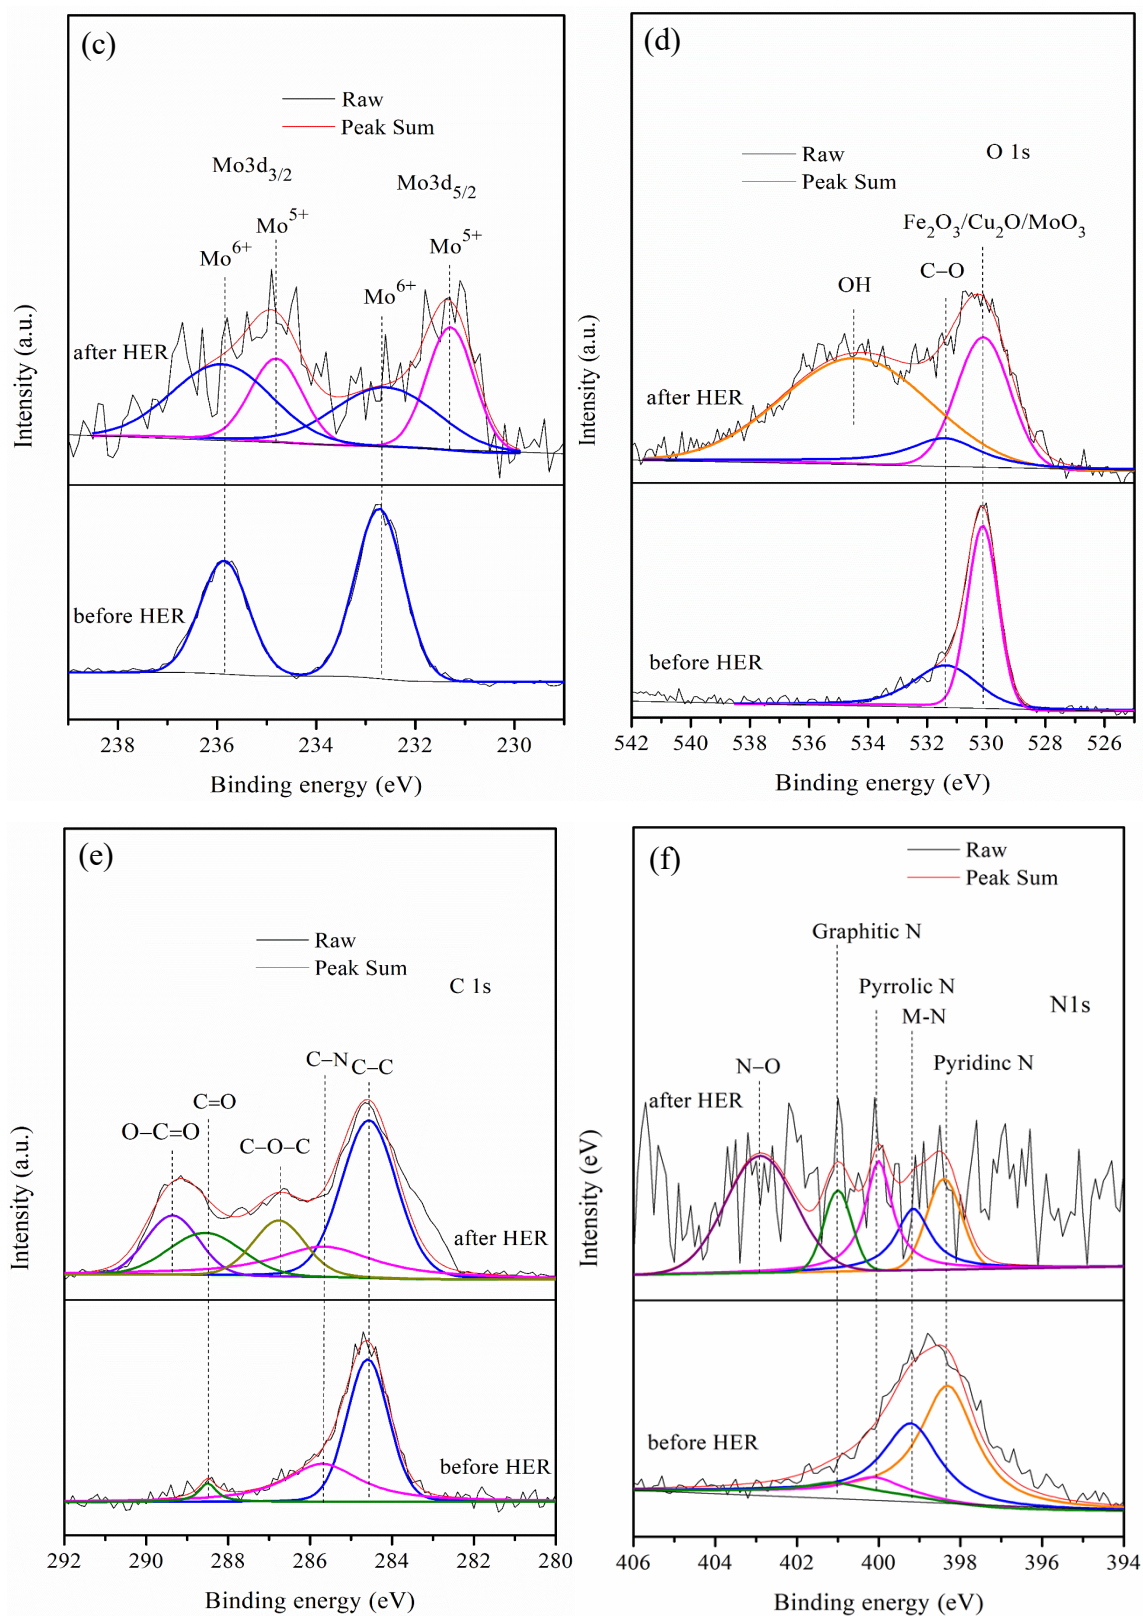

Figure S8. XPS spectra of (a) Fe 2p, (b) Cu 2p, (c) Mo 3d, (d) O 1s, (e) C 1s, (f) N 1s, on the Fe<sub>0.5</sub>Cu<sub>0.5</sub>Mo<sub>0.5</sub>-SB-300 of before and after HER.



Table S2. The electrocatalytic performance of various electrocatalysts comparison.

| Electrocatalysts                                              | ORR $\eta_3$<br>(mV) | OER $\eta_{10}$<br>(mV) | OER $\eta_{30}$<br>(mV) | HER $\eta_{10}$<br>(mV) | HER $\eta_{30}$<br>(mV) | Electrolyte | Reference |
|---------------------------------------------------------------|----------------------|-------------------------|-------------------------|-------------------------|-------------------------|-------------|-----------|
| Fe <sub>0.5</sub> Cu <sub>0.5</sub> Mo <sub>0.5</sub> -<br>SB | 560                  | 650                     | 950                     | 550                     | 670                     | 0.1 MKOH    | This work |
| Commercial<br>Pt/C                                            | 800                  |                         |                         | 280                     | > <b>1000</b>           | 0.1 MKOH    | This work |
| Commercial<br>RuO <sub>2</sub>                                | -                    | 0.55                    | <b>1020</b>             |                         |                         | 0.1 MKOH    | This work |
| NiO-NiS/N-C                                                   | -                    | 370mV                   | 400                     | -                       |                         | 1 MKOH      | [1]       |
| Co salen-<br>CNTorCo salen-<br>CNT                            | 680                  | -                       | -                       | -                       |                         | 0.1 MKOH    | [2]       |

[1] M. Gao, L. Yang, B. Dai, X. Guo, Z. Liu, B. Peng, *J. Solid State Electrochem.*, 2016, **20**, 2737–2747.

[2] L. Bai, M. Li, J. Guan, *ChemistrySelect*, 2018, **3**, 581 –585.
